# Supplementary material for: Genome-Wide Identification of PIN and PILS Gene Families in Areca catechu and the Potential Role of AcPIN6 in Lateral Brace Root Formation
Source: Plants (Basel). 2022 Dec 21;12(1):33. doi: 10.3390/plants12010033 (PMC9824567; doi:10.3390/plants12010033)
Supplement: Supplementary file 1 [file plants-12-00033-s001.zip › Supplementary Table.xlsx]

## Sheet: table S1
Table S1. Number of PIN/PILS genes in different plant species.
Species	Long PIN			PIN6	PIN9	PIN10	Short PIN									Total
	PIN1	PIN2	PIN3/4/7				PIN5	PIN8	PILS1	PILS2	PILS3	PILS4	PILS5	PILS6	PILS7
A.thaliana	1	1	3	1	0	0	1	1	1	1	1	1	1	1	1	15
O.sativa	4	1	0	0	1	2	3	1	1	1	0	0	2	2	0	18
A.comosus	2	1	0	1	2	0	4	1	5	2	0	0	0	3	4	25
A.catechu	2	2	2	1	2	0	2	1	0	2	0	0	0	4	2	20
E.guineensis	5	2	4	1	1	0	2	1	2	2	0	0	0	11	7	38
C.nucifera	3	1	2	2	2	0	3	0	1	1	0	0	0	3	2	20
P.dactylifera	5	1	2	1	1	0	2	1	5	1	0	0	1	4	8	22

## Sheet: table S2
Table S2. PIN/PILS family genes in A. catechu.
ID	Name	Number of amino acids	Molecular weight	Isoelectric Point	Instability index
AC13G093180.1	AcPIN1a	603	64851.1	8.95	35.62
AC03G010990.1	AcPIN1b	612	66963.3	8.97	44.01
AC08G030960.1	AcPIN2a	627	67609.3	9.24	38.95
AC06G001860.1	AcPIN2b	453	49168.6	7.53	47.71
AC14G016980.1	AcPIN3a	533	56383.3	9.08	36.13
AC02G037360.1	AcPIN3b	648	69222.9	8.96	36.96
AC10G091050.1	AcPIN5a	266	29184.3	8.37	37.08
AC06G078160.1	AcPIN5b	341	37051.1	8.81	32.83
AC08G122700.1	AcPIN6	539	58982.8	8.63	43.36
AC02G006350.1	AcPIN8	357	38851.6	9.06	34.98
AC13G091070.1	AcPIN9a	349	38040.3	9.56	43.33
AC13G091760.1	AcPIN9b	349	38040.3	9.56	43.33
AC05G080760.1	AcPILS2a	438	47922.6	7.14	34.09
AC05G081940.1	AcPILS2b	438	47936.7	7.14	34.18
AC13G098830.1	AcPILS6a	438	48153.6	8.83	41.62
AC13G012690.1	AcPILS6b	416	45022.7	8.87	39.18
AC09G009160.1	AcPILS6c	416	45199	8.6	37.6
AC03G028260.1	AcPILS6d	414	44552.2	7.51	43.52
AC12G088170.1	AcPILS7a	422	45460.8	6.13	37.65
AC16G012150.1	AcPILS7b	420	45775.8	6.6	40.22

## Sheet: table S3
Table S3. Identification of AcPIN/AcPILS family gene duplication events
	Duplicate 1	Location	Duplicate 2	Location	E-value
WGD	AC06G001860	Chr6:2812070	AC08G030960	Chr8:38969892	5e-143
	AC14G016980	Chr14:21870017	AC02G037360	Chr2:46796230	0
	AC10G091050	Chr10:150595529	AC06G078160	Chr6:143416624	1e-138
	AC05G080760	Chr5:156788399	AC05G081940	Chr5:158382710	0
	AC13G098830	Chr13:175727819	AC03G028260	Chr3:38348373	0
	AC03G028260	Chr3:38348373	AC09G009160	Chr9:11101742	0
TRD	AC13G093180	Chr13:167656597	AC02G037360	Chr2:46796230	0
	AC03G010990	Chr3:15325903	AC02G037360	Chr2:46796230	0
	AC08G122700	Chr8:193798683	AC02G037360	Chr2:46796230	5e-56
	AC02G006350	Chr2:7986584	AC06G078160	Chr6:143416624	8e-76
	AC13G091760	Chr13:165555384	AC06G078160	Chr6:143416624	3e-61
DSD	AC13G093180	Chr13:167656597	AC14G016980	Chr14:21870017	7e-174
	AC03G010990	Chr3:15325903	AC13G093180	Chr13:167656597	0
	AC08G030960	Chr8:38969892	AC13G093180	Chr13:167656597	0
	AC06G001860	Chr6:2812070	AC13G093180	Chr13:167656597	1e-115
	AC02G037360	Chr2:46796230	AC08G030960	Chr8:38969892	0
	AC10G091050	Chr10:150595529	AC02G006350	Chr2:7986584	4e-53
	AC08G122700	Chr8:193798683	AC03G010990	Chr3:15325903	1e-52
	AC02G006350	Chr2:7986584	AC13G091070	Chr13:164631519	5e-96
	AC13G091760	Chr13:165555384	AC03G010990	Chr3:15325903	4e-44
	AC05G080760	Chr5:156788399	AC13G098830	Chr13:175727819	7e-83
	AC05G081940	Chr5:158382710	AC13G098830	Chr13:175727819	3e-83
	AC09G009160	Chr9:11101742	AC05G081940	Chr5:158382710	2e-82
	AC03G028260	Chr3:38348373	AC05G081940	Chr5:158382710	4e-87
	AC16G012150	Chr16:13990206	AC13G098830	Chr13:175727819	1e-55

## Sheet: table S4
Table S4. Ka and Ks calculations of the AcPIN/AcPILS genes pairs.
Homoeologous Genes		Ka	Ks	Ka/Ks
AcPILS7a	AcPILS7b	0.288042	1.33234	0.216192
AcPILS6b	AcPILS6a	0.129625	0.77355	0.167571
AcPILS6b	AcPILS6d	0.0949263	0.829656	0.114416
AcPILS6a	AcPILS6d	0.0845407	0.218223	0.387406
AcPILS6b	AcPILS6c	0.0493328	0.254813	0.193604
AcPILS6a	AcPILS6c	0.131047	0.794662	0.164909
AcPIN3a	AcPIN3b	0.052551	0.357324	0.147068
AcPILS6d	AcPILS6c	0.101197	0.833877	0.121357
AcPIN2b	AcPIN2a	0.309869	0.834137	0.371484

## Sheet: table S5
Table S5. The primers used for quantitative real-time PCR
Gene	Primer	Sequences
AcPIN1a	qAcPIN1a F	GGCGTCTCCATCACTCCCC
AcPIN1a	qAcPIN1a R	GCGTTCCTCCCATTCACCA
AcPIN1b	qAcPIN1b F	CTCATCACCGAGCAGTTCC
AcPIN1b	qAcPIN1b R	CGTTGGTGAGGTTGGAAGG
AcPIN2a	qAcPIN2a F	TTCAACCAGACGGACTTTT
AcPIN2a	qAcPIN2a R	TGCCACCATCCTTCTTACT
AcPIN2b	qAcPIN2b F	CTACCCTGCTTTGTCTTGC
AcPIN2b	qAcPIN2b R	GAGTCCTTCCTTCGCTCTT
AcPIN3a	qAcPIN3a F	TACTCCCTCCACTCCTCCC
AcPIN3a	qAcPIN3a R	ATTCTGCTGCTGCTGCGTC
AcPIN3b	qAcPIN3b F	AGAACAAAGCACCGCACCA
AcPIN3b	qAcPIN3b R	CACCTCCGTAACGCTCACC
AcPIN5a	qAcPIN5a F	GCTCCGCTGCTCAACGAGT
AcPIN5a	qAcPIN5a R	CCCCGGTGATGTTCCCTTC
AcPIN5b	qAcPIN5b F	GGTGAAGGATGTGGAGGGG
AcPIN5b	qAcPIN5b R	TTCCGACTGCGGTCAAGTT
AcPIN9a	qAcPIN9a F	AACCGCTTCGTCTCCGTCT
AcPIN9a	qAcPIN9a R	GGTCCGAGGTCCGTACATG
AcPIN6	qAcPIN6 F	TCCGTTAAATGGTGGAAGAT
AcPIN6	qAcPIN6 R	CTGGTAAGGGTTGTTGTGGG
AcPIN8	qAcPIN8 F	GGAGGAATACACCCCAGAC
AcPIN8	qAcPIN8 R	CTGAGATGCCATGAAAAGG
AcPILS2a	qAcPILS2a F	GACAACCCATTCGGACCAG
AcPILS2a	qAcPILS2a R	TCTGCGACGAGCCTGAAAT
AcPILS2b	qAcPILS2b F	GACAACCCATTCGGACCAG
AcPILS2b	qAcPILS2b R	TCTGCGACGAGCCTGAAAT
AcPILS7a	qAcPILS7a F	CAATGGAGGCTACAGGGAT
AcPILS7a	qAcPILS7a R	GCTGCAATAGTTGGTGGTG
AcPILS7b	qAcPILS7b F	ATGATTCAAATGGGAGCCT
AcPILS7b	qAcPILS7b R	TTATTGCACCAACGATAAA
AcPILS6a	qAcPILS6a F	CATTTGGGCAGTGGCTTAT
AcPILS6a	qAcPILS6a R	CCTCAGGCTTTTGTGGAGT
AcPILS6b	qAcPILS6b F	TCTGTGCCGAGACAAATCCA
AcPILS6b	qAcPILS6b R	CCTTGTTGTTCCAGGCTCTT
AcPILS6c	qAcPILS6c F	CAACCCTTTTGGTGACTCTA
AcPILS6c	qAcPILS6c R	GATTCCAGCCCTATCATTCC
AcPILS6d	qAcPILS6d F	CCTAACAAATGTAGCCAAGA
AcPILS6d	qAcPILS6d R	GCTGACTATTTCCCCTCTTT
Pd actin	qPd actin F	ATGGTGAAGGCTGGATTTGC
Pd actin	qPd actin R	CGGTGAGGAGAACTGGGTGT
Eg actin	qEg actin F	CTCAACCCCAAGGCAAACAG
Eg actin	qEg actin R	AGCAAGATCCAATCGAAGGA
Cn actin	qCn actin F	ATAAAGTATGGCTGATGCTGAGG
Cn actin	qCn actin R	CAACAATGCTTGGGAACACA
CnPIN6a	qCnPIN6a F	TCGGCGATGGTGAATTGCTC
CnPIN6a	qCnPIN6a R	TTGTCGTCGTCGGTGGGGTT
PdPIN6	qPdPIN6 F	GAGGGACAAGGGGACAAGGA
PdPIN6	qPdPIN6 R	TCCGGCCAACCATAGTCAAG
Egpin6	qEgpin6 F	CATTCCCCTCCTACGTGCCA
Egpin6	qEgpin6 R	ACCCCACCGACGACGACAAC
Ac actin	qAc actin F	AAGGCTGGATTTGCTGG
Ac actin	qAc actin R	GCCTTGGGGTTGAGAGGGGC

## Sheet: table S6
Table S6. The primers used for Full-Length AcPIN6 and AcPIN6-Egfp
Gene	Primer	Sequences
AcPIN6	AcPIN6 F	GCTCTAGAATGATCACCCCGGAGGACTTCTACACCGTT
AcPIN6	AcPIN6 R	GGACTAGTTATCTGCCCAAAGACTGTTACCATCGATAT
AcPIN6-eGFP	AcPIN6-Egfp F	GCTCTAGAATGATCACCCCGGAGGACTTCTACACCGTT
AcPIN6-Egfp	AcPIN6-Egfp R	GGACTAGTATGGAGAACATACCCTGTGCTAAGTATGTC
AcPIN6 CDS		ATGATCACCCCGGAGGACTTCTACACCGTTATGTGCGCCATGGTGCCACTCTACGTGGCCATGCTCCTCGCCTACGCCTCCGTTAAATGGTGGAAGATCTTCACCCCCGAGCAGTGCTCCGGCATCAATCGCTTCGTCGCCGTCTTCGCCGTCCCGGTCCTCTCCTTCCACTTCATCGCCCACAACAACCCTTACCAGATGGACACCCGCTTCATCCTCGCCGACACTCTTTCTAAGCTCCTCGTCCTCGTCCTCCTCTCCCTCTGGGCCTGCCTCTCCCCCTCCTCCCCCGGCCGCAGCCGCCTCGACTGGCTCATCACCCTCTTCTCCATCGCCACCCTCCCTAACACCCTCGTCATGGGCATCCCCCTCCTACGTGCCATGTATGGAGACTTCACC…
